# Supplementary material
Source: publisher figshare collection journal article supplement (https://tandf.figshare.com/ndownloader/files/36578427)
Supplement: Supplementary file 1 [file 36578427]

**APPENDIX 1. DETAILED SEARCH STRATEGY**

**Databases: CENTRAL, CINAHL, MEDLINE, PUBMED**

1. MeSH descriptor: [Spinal Cord Injuries]
2. MeSH descriptor: [Quadriplegia]
3. MeSH descriptor: [Paraplegia]
4. Spinal cord injur* OR Spinal chord injur* OR Spinal AND (ischemi* or laceration* or trauma* or syndrom* or contusion* or transaction*) OR Paraplegi* OR Tetraplegi* OR Quadriplegi*
5. #1 OR #2 OR #3 OR #4
6. MeSH descriptor: [Breathing exercises]
7. Inspiratory muscle training OR IMT OR Respiratory muscle training OR RMT Resisted inspiratory training OR RIT OR Powerbreathe OR Breathing exercis* OR Hyperpnoea training OR Hyperpnea training
8. #6 OR #7
9. #5 AND #8

**Database: PEDro**

Search strategy: Advanced

Abstract and Title: Spinal cord injur* AND inspiratory muscle training
